# Supplementary material for: Arsenic trioxide inhibits liver cancer stem cells and metastasis by targeting SRF/MCM7 complex
Source: PubMed Central journal article supplement (PMC6560089; doi:10.1038/s41419-019-1676-0), 2019-06-11
Supplement: 41419_2019_1676_MOESM1_ESM.pdf [file 41419_2019_1676_MOESM1_ESM.pdf]

Supplementary Materials For

## **Arsenic Trioxide Inhibits Liver Cancer Stem Cells and Metastasis by Targeting SRF/MCM7 Complex**

Hai-Yang Wang<sup>1,3,\*</sup>, Biao Zhang<sup>1,3,\*</sup>, Jun-Nian Zhou<sup>1,2,3,#</sup>, Dong-Xing Wang<sup>1,3</sup>, Ying-Chen Xu<sup>4</sup>, Quan Zeng<sup>1,3</sup>, Ya-Li Jia<sup>1,2,3</sup>, Jia-Fei Xi<sup>1,3</sup>, Xue Nan<sup>1,3</sup>, Li-Juan He<sup>1,3</sup>, Wen Yue<sup>1,3,#</sup>, Xue-Tao Pei<sup>1,3,#</sup>

# Corresponding authors: [zhoujunnian@alu.fudan.edu.cn](mailto:zhoujunnian@alu.fudan.edu.cn) (JNZ), [yuewen@bmi.ac.cn](mailto:yuewen@bmi.ac.cn) (WY) and [peixt@bmi.ac.cn](mailto:peixt@bmi.ac.cn) (XTP)

### **This file includes:**

#### **Supplemental figures**

Supplementary Figure 1: The biological effects of ATO on human normal fetal liver cell line L02 cells and HCC bulk cells.

Supplementary Figure 2: ATO attenuates liver CSC-associated traits in HCC cells.

Supplementary Figure 3: ATO inhibits tumorigenic capacity of Huh7.5.1 cells.

Supplementary Figure 4: MCM7 expression in multiple cancers tissues.

Supplementary Figure 5: Establishment of MCM7-knockdown HCC cells.

Supplementary Figure 6: Immunofluorescence analysis of CK18 expression in MCM7-knockdown HCC cells.

Supplementary Figure 7: Western blot analysis of MCM7 expression in tumorspheres.

Supplementary Figure 8: Effect of MCM7 knockdown on the tumorigenic capacity of Huh7.5.1 cells.

Supplementary Figure 9: ATO binds to MCM7 but does not directly degrade MCM7 protein.

#### **Supplemental methods**

#### **Supplemental tables**

Supplementary Table 1: The primers used in the study.

Supplementary Table 2: The antibodies used in the study.

Supplementary Table 3: The correlations between MCM7 nucleic expression pattern and clinico-pathologic factors in 76 HCC patients.

#### **Supplemental references**

## Supplementary figures

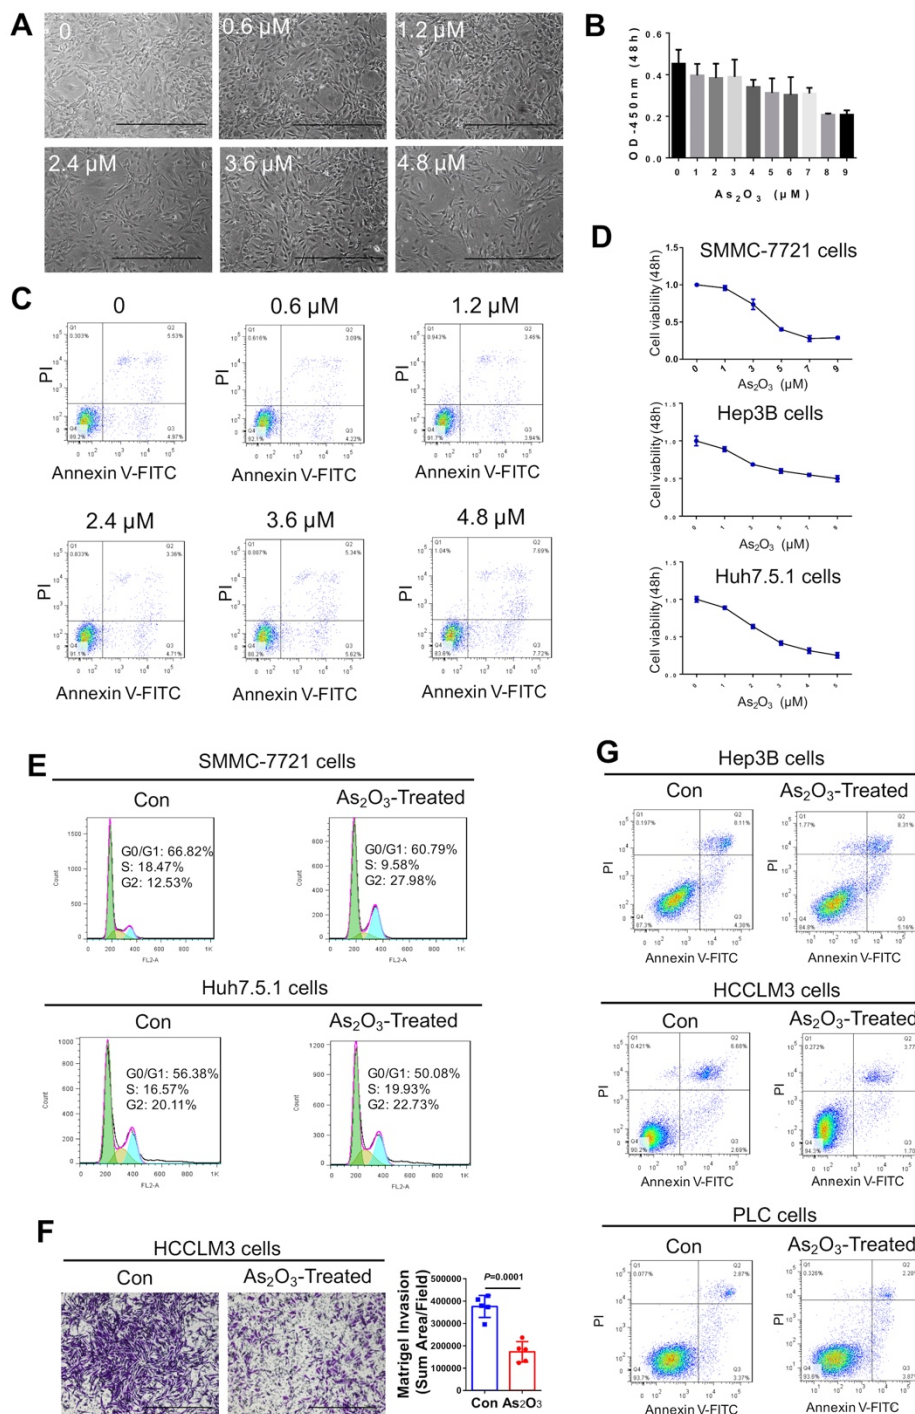

**Supplementary Figure 1** The biological effects of ATO on human normal fetal liver cell line L02 cells and HCC bulk cells. **(A)** Morphological observation of L02 cells 48h after treatment with indicated concentrations of ATO. Bars, 200 μm. **(B)** Cell viability of L02 cells 48h after treatment with indicated concentrations of ATO. **(C)** Cell apoptosis assay of L02 cells 48h after treatment with indicated concentrations of ATO. **(D)** Cell viability of HCC cells 48h after treated with indicated concentrations of ATO. **(E)** Cell cycle analysis of HCC cells 48h after

treated with 3.6  $\mu\text{M}$  of ATO. **(F)** Matrigel invasion assay of HCCLM3 cells, with a high invasive and metastasis capacity, 48h after treated with 3.6  $\mu\text{M}$  of ATO. Bars, 500  $\mu\text{m}$ . *P* value was determined by Student's t-test. **(G)** Cell apoptosis assay of HCC cells 48h after treated with 3.6  $\mu\text{M}$  of ATO.

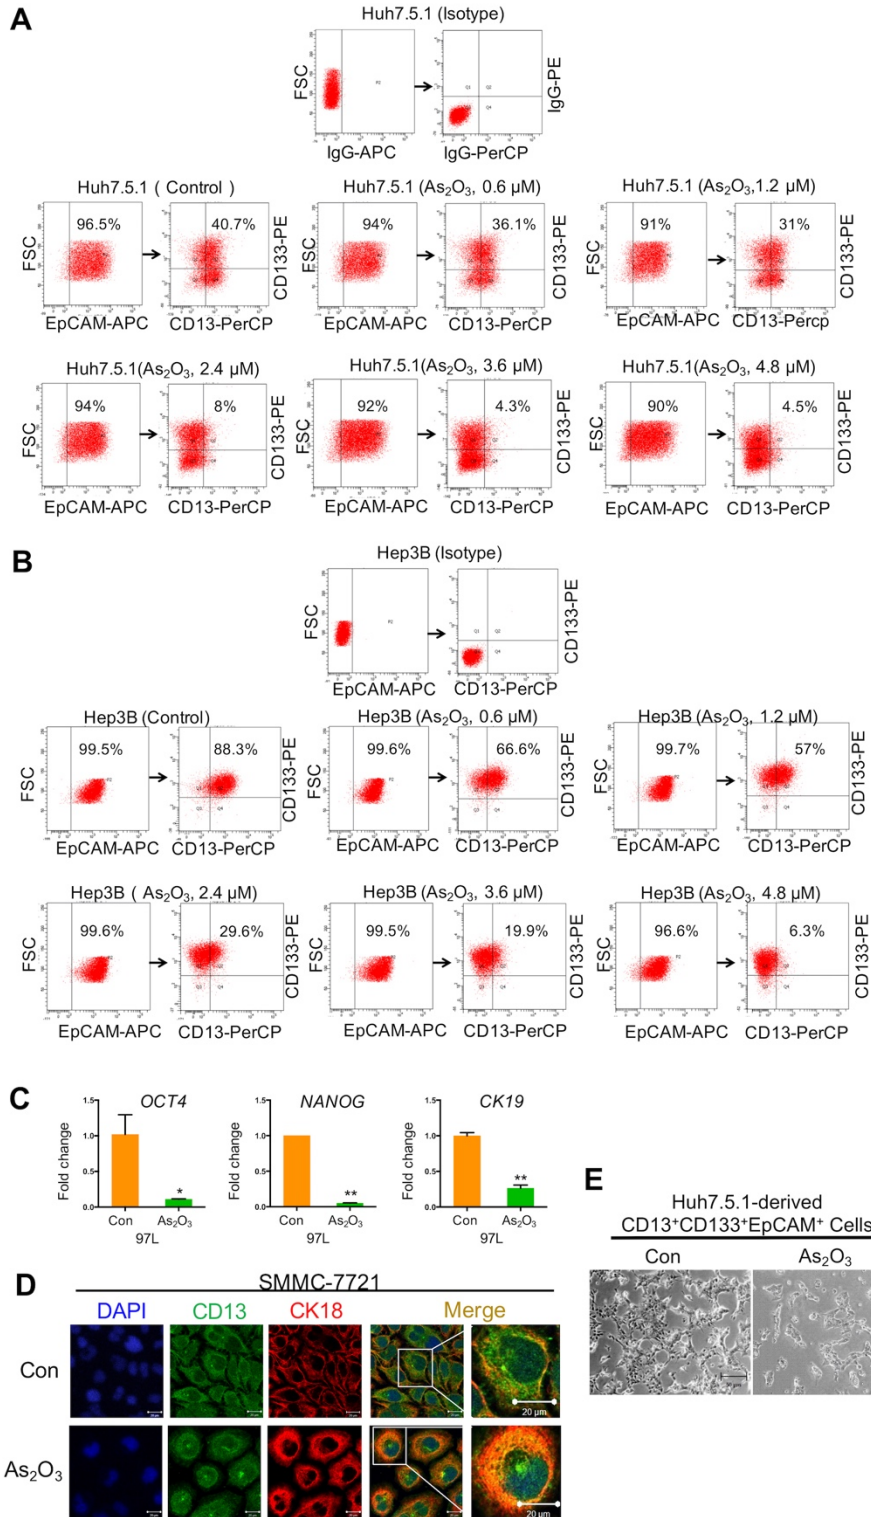

**Supplementary Figure 2 ATO attenuates liver CSC-associated traits in HCC cells.** (A, B) Flow cytometry scatter diagrams of CD13, CD133 and EpCAM (corresponding to Figure 2B) of Huh7.5.1 cells and Hep3B cells at indicated concentrations of ATO. (C) Relative values of *OCT4*, *NANOG* and *CK19* gene expression in 97L cells. (D) Immunofluorescence analysis of CD13 and CK18 expressions after ATO treatment in SMMC-7721 cells. Bars, 20  $\mu\text{m}$ . (E) The appearance of the same number of Huh7.5.1-derived CD13<sup>+</sup>CD133<sup>+</sup>EpCAM<sup>+</sup> cells culture in 1:1 mixture of neurobasal medium (GIBCO) and DMEM/F12 medium (Life Technologies) supplemented with 0.5 $\times$  N2 (GIBCO), 0.5 $\times$  B27 supplements (GIBCO), 0.1% bovine serum albumin (AMRESCO), 2 mmol/L glutamine (R&D), 0.1 mmol/L 2-mercaptoethanol (Sigma, St. Louis, MO), 10 ng/mL BMP4 (R&D), 10 ng/mL basic fibroblast growth factor (bFGF, Peprotech, Rocky Hill, NJ), 10 ng/mL epidermal growth factor (EGF, R&D, Minneapolis, MN), 20 ng/mL hepatocyte growth factor (HGF, R&D), 20 ng/mL TGF $\alpha$  (Peprotech) (1), 48h after ATO treatment or not. Bars, 50  $\mu\text{m}$ .

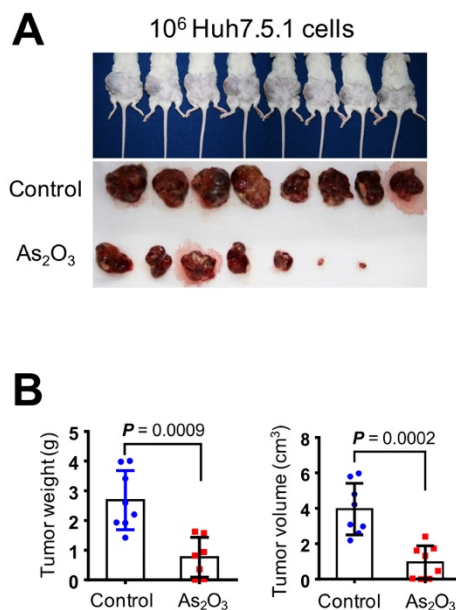

**Supplementary Figure 3 ATO inhibits tumorigenic capacity of Huh7.5.1 cells.** (A) Gross observation of tumor-bearing mice (top) and peeled tumors (bottom), derived from 10<sup>6</sup> Huh7.5.1 cells. (B) Comparison of tumor weight and tumor size between ATO-treated group and control group.

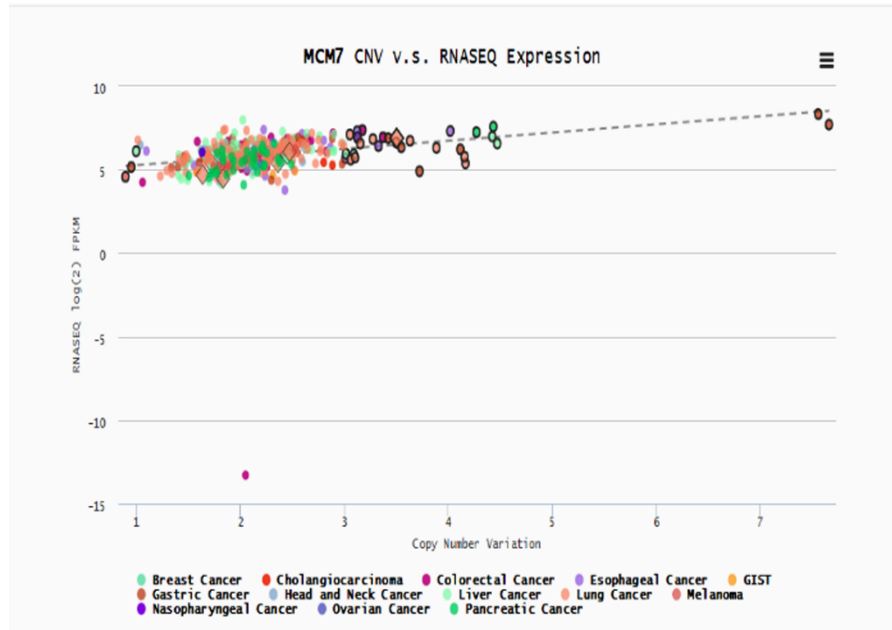

**Supplementary Figure 4 MCM7 expression in multiple cancers tissues.** RNA sequencing data of MCM7 mRNA in multiple cancers tissues as indicated. (<https://onco.wuxiapptec.com/search/gene>).

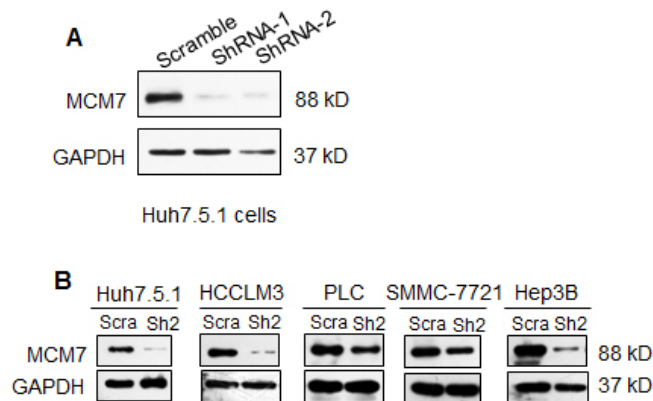

**Supplementary Figure 5 Establishment of MCM7-knockdown HCC cells.** (A) Validation the knockdown effects of two constructed psicoR-shMCM7-GFP lentivirus vector (shRNA-1 and shRNA-2) by western blot analysis in Huh7.5.1 cells with the scramble as controls (psicoR-scramble-GFP, scram). (B) Western blot analysis of MCM7 expression in HCC cells with stable knockdown of MCM7 by the psicoR lentivirus vector (psicoR-shMCM7) with the scramble as a control (psicoR-scramble).

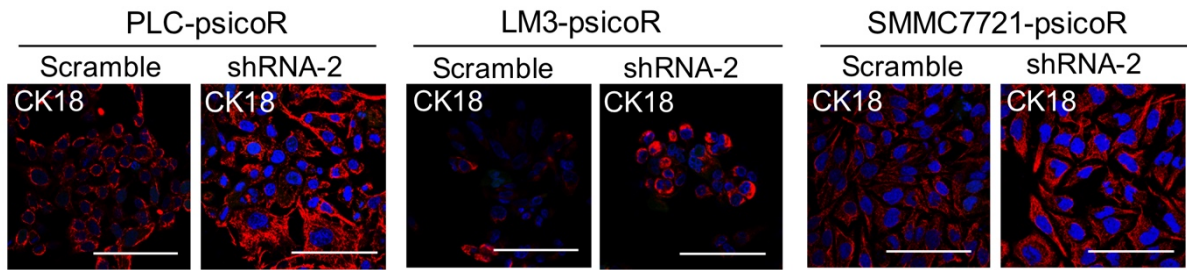

**Supplementary Figure 6** Immunofluorescence analysis of CK18 expression in MCM7-knockdown HCC cells. CK18 expression of psicoR-shMCM7-GFP stable cells and control cells were evaluated under the same exposure conditions. Bars, 50 μm.

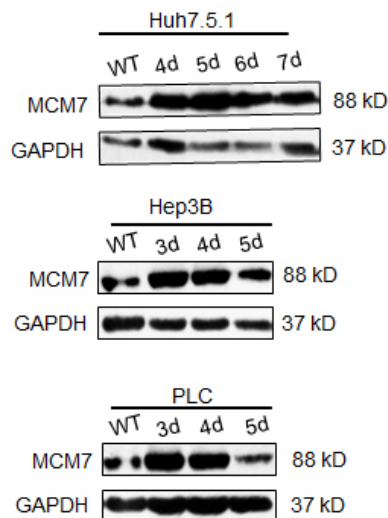

**Supplementary Figure 7 Western blot analysis of MCM7 expression in tumorspheres.** Western blot analysis of MCM7 expression in tumorspheres from three HCC cell lines at the indicated days. WT, wild type adherent cells.

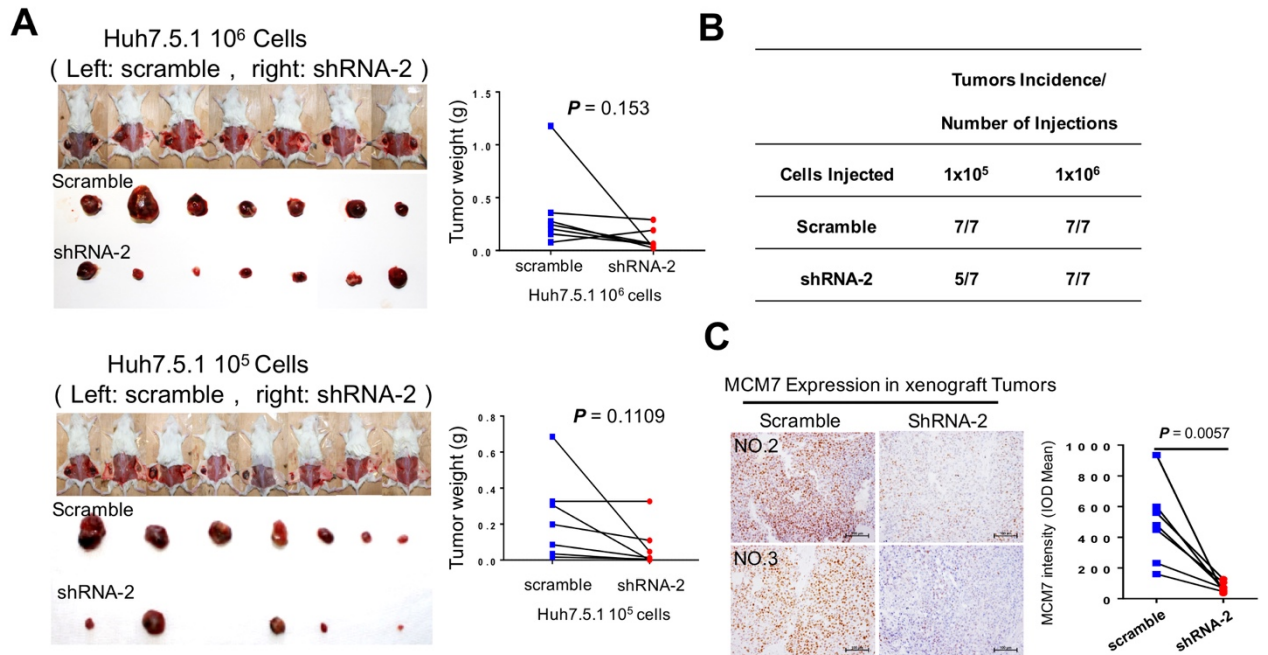

**Supplementary Figure 8 Effect of MCM7 knockdown on the tumorigenic capacity of Huh7.5.1 cells.** (A) Gross observation of tumor-bearing NOD/SCID mice and peeled tumors derived from Huh7.5.1-psycoR-shMCM7-GFP cells and scramble cells at two dilutions (left). (Right) shows the comparison of tumor weight between the shMCM7 group and control group. (B) Tumor incidence of the cells from each group at each dilution. (C) Representative examples (left) and quantitative analysis (right) of the IHC staining of MCM7 in the tumors derived from Huh7.5.1-psycoR-shMCM7 cells and scramble cells.

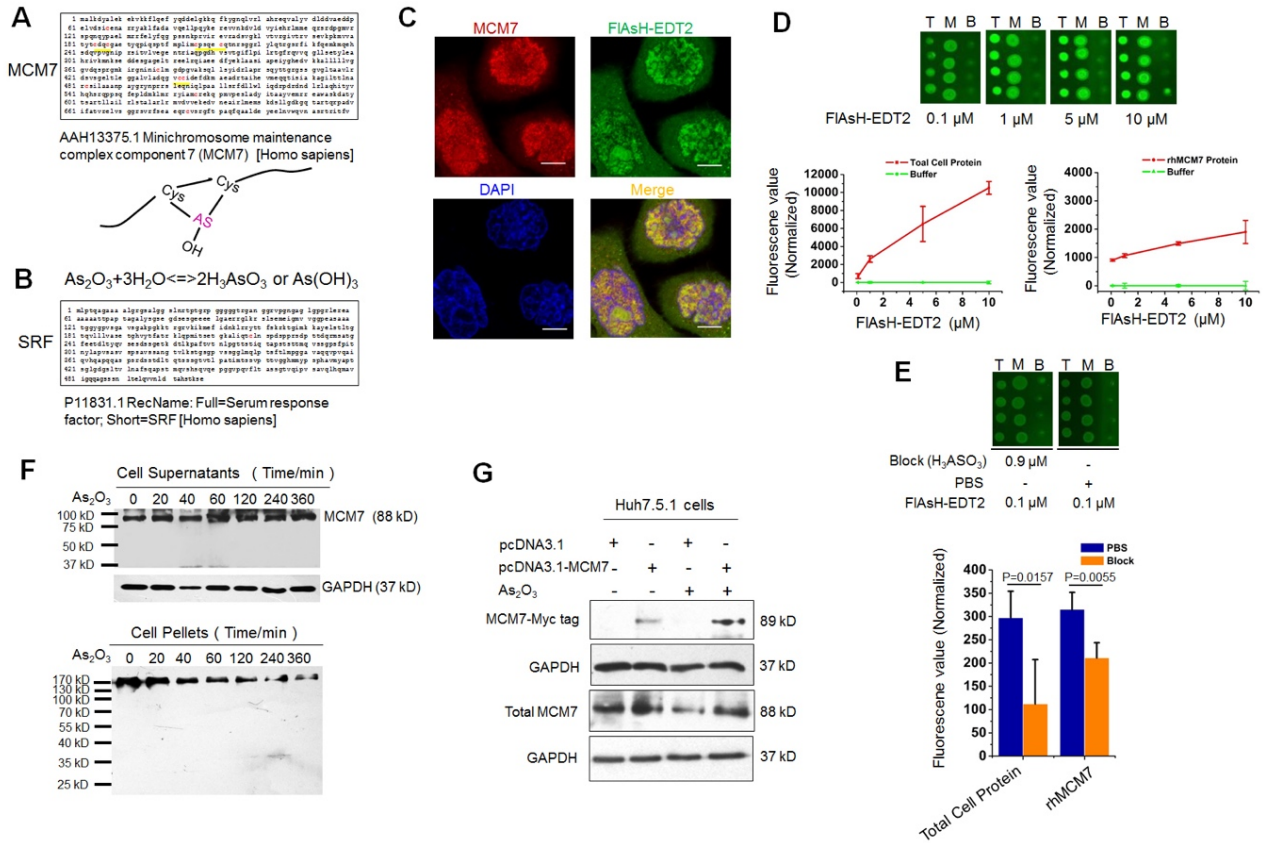

**Supplementary Figure 9 ATO binds to MCM7 but does not directly degrade MCM7 protein.** (A, B) A schematic diagram for arsenic binding to double Cys in the protein. The sequence of human MCM7 (A) and SRF (B) protein are listed. All the residues Cys (abbreviation, C) are marked with red colour in the sequence, respectively. The yellow lines highlight the double Cys with potential binding of arsenic in MCM7. (C) Dual immunofluorescence for MCM7 (red) and FIAsh-EDT2 (Green, a biarsenical labelling reagent) in HCC cells. Bars, 10 μm. (D, E) *In vitro* arsenic-protein binding assay of coated purified MCM7 protein and FIAsh-EDT2 (green, a biarsenical labelling reagent) at the indicated concentrations (D) and a blocking experiment by H<sub>3</sub>AsO<sub>3</sub> (E). The green fluorescence signals were scanned by GenePix 4000B. T, total protein from 7721 cells lysed in RIPA buffer, as a positive control; M, recombinant human full-length MCM7 protein; B, Tris-HCl buffer as a negative control. (F) Western blot analysis of expressions of total MCM7 protein and MCM7-c-myc-tag fusion by anti-MCM7 antibody and anti-c-myc tag antibody, respectively, in Huh7.5.1-pcDNA3.1-MCM7 cells and Huh7.5.1-pcDNA3.1-con cells 48h after ATO treatment. (G) A time-course study showing the effects of ATO on MCM7 protein expression. Huh7.5.1 cells were treated with 3.6 μM ATO and then lysed in RIPA buffer and fractionated into supernatants (S) and pellets (P) by centrifugation at the indicated time.



## **Supplementary methods**

### ***Microarray***

The microarray experiments were performed in the laboratory of the OE Biotech Company (Shanghai, China). For Huh7.5.1 cells and SMMC-7721 cells treated with ATO (Arsenious Acid and Sodium Chloride Injection, Heilongjiang Harbin Yida Pharmaceutical Co., Heilongjiang, China), the Affymetrix Human PrimeView Array was used for gene expression profiling analysis. Total RNA was quantified by the NanoDrop ND-2000 (ThermoFisher Scientific, Waltham, MA) and the RNA integrity was assessed using Agilent Bioanalyzer 2100 (Agilent Technologies, Santa Clara, CA). The sample labelling, microarray hybridization and washing were performed based on the manufacturer's standard protocols. Briefly, total RNA was transcribed to double strand cDNA, then synthesized cRNA and labelled with biotin. The labelled RNAs were hybridized onto the microarray. After washing, the arrays were scanned by the Affymetrix Scanner 3000 (Affymetrix, Santa Clara, CA). The array images were analysed with Affymetrix GeneChip Command Console (version 4.0, Affymetrix), followed by the basic analysis with the Genespring software (version 13.1; Agilent Technologies). The raw data was normalized with the RMA algorithm. Differential expression was determined based on fold change (FC) and the false discovery rate (FDR). The FDR was used to evaluate the significance of the *P*-value calculated with t-test. The threshold set for up-regulated and down-regulated mRNAs was a  $FC \geq 2.0$  and a  $P \leq 0.05$ . The data analysis including GO analysis and Kyoto Encyclopedia of Genes and Genomes (KEGG) analysis was performed by OE Biotech Company (Shanghai, China).

### ***Vector constructs and cell transfections***

The expression construct for human full-length MCM7 was generated by cloning PCR-amplified MCM7 cDNA fragments into the pcDNA3.1(-)/Myc-His vector (Invitrogen) for transient transfection. The pLenti6/V5-DEST-MCM7 (Addgene #31212) (2). was used for stable transfection following selection with blasticidin (Invitrogen, Carlsbad, CA; 5 µg/ml) for 5-7 days. The expression construct pBPLV-SRF-GFP was constructed by cloning PCR-amplified SRF cDNA from pCGN-SRF (addgene #11977). The promoter sequences of *MCM7* (1461 bp; Gene ID: 4176, position: -1461~0) were amplified via PCR using human genomic DNA and were inserted into the pGL4 basic vector (Promega, Madison, WI). To generate the plasmid for stable RNA interference (RNAi), hairpins were designed and cloned into psicoR-GFP lentiviral vector from Jacks Lab (MIT Center for Cancer Research, Cambridge, MA). A non-targeting, scrambled silencing RNA was used as control. The lentivirus packaging and cell transfection have been previously described (3-5). For transient transfections, 2-4 µg of plasmid DNA per six-well were used. The transfections were performed using Lipofectamine 2000 (Invitrogen, Carlsbad, CA) following the manufacturer's protocol. The cells were harvested for further assays 24-48 h after transfection. The total protein of the transfected cells was prepared 72 h after transfection.

### ***Reverse-transcription PCR (RT-PCR) and quantitative RT-PCR (qRT-PCR)***

RNA isolation, reverse transcription and qRT-PCR of genes were performed as previously described (3, 4). Total RNA was isolated using TRIzol reagent (Invitrogen) according to the manufacturer's instructions. The experiments were performed with the ReverTra Ace qPCR RT Master Mix (TOYOBO, Osaka Prefecture, Japan) and the THUNDERBIRD SYBR qPCR Mix (TOYOBO) according to the manufacturer's protocol. The quantification of gene expression was based on

the  $\Delta\Delta C_t$  method and normalized to GAPDH RNA as an internal control.

Quantitative analysis of mRNA levels was performed on the IQ5 Multicolor Real-Time PCR Detection System (Bio-Rad, San Diego, CA). All the primers are summarized in the supplementary Table 1.

#### ***Dual-luciferase reporter assay***

The luciferase reporter assay was performed in triplicate. The 293T cells were co-transfected with 200 ng of pcDNA3.1-*MCM7* vector and/or 200 ng of pBPLV-*SRF* and 400 ng of pGL4-*MCM7*-promoter vector or pGL4 basic vector. The pRL *Renilla* luciferase vector (Promega, Madison, WI) was used to normalize the differences in transfection efficiency among the various groups. After transfection, the cells were treated with arsenic trioxide (3.6 $\mu$ M) or PBS (as controls) for 9 hours. The cells were lysed and then measured for luciferase activity using a Dual-Luciferase Reporter Assay System (Promega) 48 h after transfection according to the manufacturer's protocol.

#### ***In vitro arsenic-protein binding assay***

The microarray slides were provided by CapitalBio Technology (Beijing, China). We used an Eppendorf pipette to absorb 1  $\mu$ L prepared samples including total cell protein lysates (positive control), recombinant full length human MCM7 protein (Origene, Rockville, MD), and the Tris-HCl Buffer (negative control), and dropped them on the surface of the slides (n=4). Then the printed slides were placed on the drying oven and fixed overnight at room temperature. After washing with PBS and blocking with (or without) H<sub>3</sub>AsO<sub>3</sub> solution, the FIASH-EDT2 dye (Life Technologies Corporation) diluted in different concentrations were incubated with the array. After a

final washing, the arrays were scanned by GenePix 4000B scanner and analysed by GenePix Pro 6.0 software.

### ***Immunoprecipitation (IP)***

The HCC cells were treated by 3.6  $\mu$ M ATO with PBS as the control. After incubation for 48 hours, cells were lysed in EBC lysis buffer (50 mM Tris-HCl, pH7.5; 100 mM NaCl, 1% NP-40) containing protease inhibitor cocktail (Roche, Basel, Switzerland). After 30 min on ice, the cell lysates were cleared by centrifugation at 4°C. The same appreciate amount of ATO-treated and control lysates were incubated with SRF-specific antibody (Cell Signaling Technologies, Danvers, MA) overnight at 4°C with rotation and Protein A/G PLUS-Agarose beads (Santa Cruz Biotechnology, Dallas, TX) for 1 h at 4°C with rotation. After three washes with EBC lysis buffer, the samples were boiled in loading buffer and immunoblotted with MCM7-specific antibody and SRF-specific antibody (Santa Cruz Biotechnology).

### ***Cell viability assay***

Cell viability was determined using the Cell Counting Kit-8 (CCK-8, Dojindo Laboratories, Kumamoto, Japan) as previously described (3). A total of  $2 \times 10^3$ - $3 \times 10^3$  L02 cells or HCC cells per well were seeded in 96-well plates with DMEM (Sigma) containing 10% fetal bovine serum (FBS, Defined) (ExCell Biology, Shanghai, China). The cells were treated with ATO at the indicated concentration. The medium was exchanged for 100  $\mu$ L DMEM plus 10  $\mu$ L CCK-8 reagents and incubated at 37°C for 2 hours. Absorbance was measured at 450nm at indicated time. For doxorubicin and sorafenib chemoresistance assay, a total of  $2 \times 10^3$ - $3 \times 10^3$  CD13<sup>+</sup>CD133<sup>+</sup>EpCAM<sup>+</sup> cells per well were seeded in 96-well plates. Twenty-four hours later, the medium was

replaced with doxorubicin (or sorafenib)-containing medium at the indicated concentration with or without 3.6  $\mu$ M ATO and incubated for 48 h.

### ***Cell apoptosis assay***

The cell apoptosis was assayed with Annexin V, FITC Apoptosis Detection Kit (Dojindo Laboratories). The adherent L02 cells or HCC cells were pre-treated with ATO at the indicated concentration. After treatment for 48 hours, the cells were detached with EDTA-free trypsin and suspended at the concentration of  $1 \times 10^6$  cells/ml in  $1 \times$  Annexin V Binding solution. The cell suspension was incubated with 5  $\mu$ L of FITC-Annexin V and 5  $\mu$ L of PI Solution per 100  $\mu$ L, followed by 15-minute incubation with protect from light. The apoptosis was analysed by flow cytometry analysis.

### ***Matrigel invasion assay***

HCCLM3 cells were pre-treated by 3.6  $\mu$ M ATO with PBS as the control. After treatment for 48 hours,  $2 \times 10^6$  HCCLM3 cells pre-treated with or without 3.6  $\mu$ M ATO were added to the Matrigel (dilution 1:8, BD Biosciences, Franklin Lakes, NJ) - coated upper chamber of 6-well Hanging Cell Culture Inserts (8.0  $\mu$ m pore size, Millipore, Billerica, MA) without FBS. The lower chamber was filled with the DMEM (Sigma Aldrich, St. Louis, MO) containing 10% FBS (ExCell Biology). After incubation for 72 hours, the cells in the bottom wells were fixed in formalin and stained with Crystal Violet (Sigma Aldrich). Each sample was repeated in 3 wells. Cells in 5 randomly selected fields ( $\times 100$ ) in each well were counted.

### ***Flow cytometry analysis and fluorescence-activated cell sorting (FACS)***

The constructed stable cells and CD13<sup>+</sup> and CD13<sup>+</sup>/CD133<sup>+</sup>EpCAM<sup>+</sup> cells were isolated via sorting after transfection as previously described (3). The expression of

CD13, EpCAM and CD133 was examined via flow cytometry in the HCC cells. Briefly, the prepared HCC cells were washed twice with PBS and then incubated with PercP-conjugated anti-human CD13 (BD Pharmingen, Franklin Lakes, NJ) and/or APC-conjugated anti-human EpCAM (Biolegend, San Diego, CA), and/or PE-conjugated anti-human CD133 (Miltenyi Biotec, Bergisch Gladbach, Germany) for 30min at 4°C. PerCP-conjugated isotype (BD Pharmingen), APC-conjugated isotype (Miltenyi Biotec), PE-conjugated isotype (BD Pharmingen), were used as controls. After incubation, the cells were washed three times and then sorted on a FACS Aria instrument (BD Bioscience, Franklin Lakes, NJ). The expression of CD13, EpCAM and CD133 was examined via flow cytometry after ATO treatment or genetic manipulation in the HCC cells.

#### ***Immunofluorescence (IF) and immunohistochemistry (IHC) staining***

Immunofluorescent staining and IHC staining were performed as previously described (3). Four-micrometer-thick paraffin sections were prepared using a Thermo Scientific Shandon Histocentre 3 Embedding Center (Thermo Scientific, Waltham, MA). Briefly, the fixed cells or tissue sections were incubated with primary antibodies overnight at 4°C after blocking, followed by incubation with fluorescein-conjugated secondary antibodies or HRP-conjugated secondary antibodies. MCM7 level in HCC tissues and corresponding nontumor (NT) tissues were evaluated by IHC on commercial tissue arrays (Super Biotek, Shanghai, China). The array contained 76 paired HCC and NT tissues. IHC staining was performed using PV kits (PV-6001 and PV-6002, Zhongshan Bio-tech Co., Ltd., Beijing, China) according to the manufacturer's instructions. Brightfield images of the H&E and IHC staining were collected with an ECLIPSE Ti microscope (Nikon). Confocal images were collected

by an LSM 510 META confocal system (Zeiss, Carl Zeiss MicroImaging, Jena, Germany).

The staining intensity of IHC was analysed using Image-Pro Plus 6.0 software (Media Cybernetics, Inc., Rockville, MD).

### ***Western blots***

Western blots were performed and analysed as previously described (3-5). Briefly, cells were lysed in RIPA buffer (50 mM Tris-HCl, pH 7.5, 150 mM NaCl, 1 % NP-40, 0.5 % sodium deoxycholate, 0.1% SDS) supplemented with protease inhibitors (Roche) overnight at 4°C with rotation. The whole-cell lysates were fractionated into supernatants and pellets by centrifugation. The cell lysates were separated on SDS-PAGE and transferred to PVDF membranes (Millipore). The blots were blocked with TBST containing 5 % skimmed milk and incubated with primary antibodies overnight at 4°C, followed by incubation with HRP-conjugated secondary antibodies (Zhongshan Bio-tech Co., Ltd.) for 1 h. Immunoreactivity was detected and the signals were analysed were detected via Immobilon Western Chemiluminescent HRP Substrate (Millipore). All the antibodies used in this study are summarized in the supplementary Table 2.

## Supplemental tables

**Supplementary Table 1** The primers used in the study.

| Gene                               | Forward primer (5'-3')                 | Reverse primer (5'-3')               |
|------------------------------------|----------------------------------------|--------------------------------------|
| AFP                                | CTTTGGGCTGCTCGCTATGA                   | GCATGTTGATTTAACAAGCTGCT              |
| CK19                               | ACCAAGTTTGAGACGGAACAG                  | CCCTCAGCGTACTGATTTCT                 |
| OCT-4                              | AGCAAAACCCGGAGGAGT                     | CCACATCGGCCTGTGTATATC                |
| NANOG                              | TCCCGAGAAAAGATTAGTCAGCA                | AGTGGGGCACCTGTTTAACTT                |
| GSN                                | AGATGGACTACCCCAAGCAGA                  | GGTCCCGCCAGTTCTTGAA                  |
| MT1X                               | GACCCCAACTGCTCCTGCTCG                  | GATGTAGCAAACGGGTCAGGGTTGTAC          |
| HMOX1                              | AAGACTGCGTTCCTGCTCAAC                  | AAAGCCCTACAGCAACTGTCTG               |
| GADD45B                            | TACGAGTCGGCCAAGTTGATG                  | GGATGAGCGTGAAGTGGATTT                |
| MCM2                               | CACCACCGCTTCAAGAACTTCC                 | TTCACCACCAGGCTCTCACG                 |
| MCM3                               | CCAAGCAGTATGAGGAGTTC                   | CTTCTTAGTAGCAGGACAGTAG               |
| MCM4                               | GACGTAGAGGCGAGGATTCC                   | GCTGGGAGTGCCGTATGTC                  |
| MCM5                               | AGCATTCGTAGCCTGAAGTCG                  | CGCATGGCAATGTTGGTGAG                 |
| MCM6                               | CAGTGGTGTTGATGGATATG                   | CATTCTTTCACAGTCATTGG                 |
| MCM7                               | CCTACCAGCCGATCCAGTCT                   | CCTCCTGAGCGGTTGGTTT                  |
| GAPDH                              | GAGTCAACGGATTTGGTCGT                   | TTGATTTTGGAGGGATCTCG                 |
| <i>MCM7</i> CDS<br>cloning primers | GCTCTAGAGCGCCACCATGGCAC<br>TGAAGGACTAC | GGGGTACCGACAAAAGTGATCCGTGTCCGG<br>GA |
| <i>SRF</i> CDS<br>cloning primers  | TCTAGAATGTTACCGACCCAAGCT               | GTCGACTCATTCACTCTTGGTGCTGT           |



|                                                |                                                                  |                                                                     |
|------------------------------------------------|------------------------------------------------------------------|---------------------------------------------------------------------|
| <i>MCM7</i><br>promoter<br>cloning primers     | <u>GCTAGCTAAAGGAAGGACAGTCT</u><br>GAGTGATCA                      | <u>CTCGAGGCCAGGAGACGAGTCCCCGGTT</u>                                 |
| <i>MCM7</i><br>promoter<br>primers for<br>CHIP | TCACCTGGAGAGCAGTTCTAGGA                                          | TGCTGTTGTGACTAGTAAGA                                                |
| <i>MCM7</i><br>promoter<br>primers for<br>CHIP | TCACTGCAACCTCTGCCTCTT                                            | ACTGGTTCATTGGTAGATT                                                 |
| <i>MCM7</i><br>shRNA-1<br>primers              | TggaaataccctcgtagtaTTCAAGAGAtact<br>acgagggatatttccTTTTTTC       | TCGAGAAAAAAAggaaataccctcgtagtaTCTCTTGA<br>AatactacgagggatatttccA    |
| <i>MCM7</i><br>shRNA-2<br>primers              | TggctaatggagatgtcaaaTTCAAGAGAtt<br>gacatctccattagccTTTTTTC       | TCGAGAAAAAAAggctaatggagatgtcaaaTCTCTTG<br>AAttgacatctccattagccA     |
| <i>SRF</i> shRNA-1<br>primers                  | TcgatgttgccatgagtattaTTCAAGAGAta<br>atactcatggcaaacatcgTTTTTTC   | TCGAGAAAAAAAcgatgttgccatgagtattaTCTCTTG<br>AAataactcatggcaaacatcgA  |
| <i>SRF</i> shRNA-2<br>primers                  | TgtgagacaggccatgtgtataTTCAAGAGAt<br>atacacatggcctgtctcacTTTTTTC  | TCGAGAAAAAAAgtgagacaggccatgtgtataTCTCTT<br>GAAatacacatggcctgtctcacA |
| shRNA-<br>scramble<br>primers                  | TTTCTCCGAACGTGTCACGTTTCA<br>AGAGAACGTGACACGTTCCGGAGA<br>ATTTTTTC | TCGAGAAAAAATTCTCCGAACGTGTCACGTT<br>CTCTTGAAACGTGACACGTTCCGGAGAAA    |

**Supplementary Table 2** The antibodies used in the study.

| Protein                                | Applications | Antibody                            | Origin | Dilution                  | Molecular weight/Localization |
|----------------------------------------|--------------|-------------------------------------|--------|---------------------------|-------------------------------|
| APC-CD13                               | FC           | 130-103-734, Miltenyi Biotec        | mouse  | 5 µL/test                 | Cell membrane                 |
| APC-IgG Isotype                        | FC           | 130-104-614, Miltenyi Biotec        | mouse  | 5 µL/test                 |                               |
| APC-EpCAM                              | FC           | 324208, Biolegend                   | mouse  | 5 µL/test                 | Cell membrane                 |
| APC-IgG Isotype                        | FC           | 400327, Biolegend                   | mouse  | 5 µL/test                 |                               |
| PerCP-Cy <sup>TM</sup> 5.5-CD13        | FC           | 561361, BD Pharmingen <sup>TM</sup> | mouse  | 5 µL/test                 | Cell membrane                 |
| PerCP-Cy <sup>TM</sup> 5.5-IgG Isotype | FC           | 550795, BD Pharmingen <sup>TM</sup> | mouse  | 5 µL/test                 |                               |
| PE-CD133                               | FC           | 130-080-801, Miltenyi Biotec        | mouse  | 5 µL/test                 | Cell membrane                 |
| PE-IgG Isotype                         | FC           | 555574, BD Pharmingen <sup>TM</sup> | mouse  | 10 µL/test                |                               |
| CD13                                   | IHC          | sc-166270, Santa Cruz Biotechnology | mouse  | 1:200                     | Cell membrane/<br>cytoplasmic |
| CD13                                   | IF           | ab7417, Abcam                       | mouse  | 1:200                     | Cell membrane/<br>cytoplasmic |
| AFP                                    | IF           | NB100-1611, Novus Biologicals       | rabbit | 1:200                     | Cytoplasmic                   |
| MCM7                                   | WB, IHC      | sc-9966, Santa Cruz Biotechnology   | mouse  | 1:1000,<br>1:200          | 88 kDa/Nuclei,<br>cytoplasmic |
| MCM7                                   | IF           | 3735S, CST                          | rabbit | 1:200                     | Nucleus/cytoplasmic           |
| SRF                                    | IF, CHIP, IP | 5147S, CST                          | rabbit | 1:200,<br>1:500,<br>1:100 | Nucleus                       |
| SRF                                    | WB           | sc-335x, Santa Cruz Biotechnology   | rabbit | 1:1000                    | 67kDa/Nucleus                 |
| CK18                                   | IF           | ab133263, Abcam                     | rabbit | 1:200                     | Cytoplasmic                   |
| CK19                                   | IHC          | ab52625, Abcam                      | rabbit | 1:200                     | Cytoplasmic                   |
| MYC-Tag                                | WB           | 2276S, CST                          | mouse  | 1:1000                    |                               |
| V5-Tag-HRP                             | WB           | PM003-7, MBL                        | rabbit | 1:5000                    |                               |
| GAPDH-HRP                              | WB           | 8884, CST                           | rabbit | 1:1000                    | Cytoplasmic                   |

**Supplementary Table 3** The correlations between MCM7 nucleic expression pattern and clinico-pathologic factors in 76 HCC patients

|                                                       |              | MCM7 Nuclei Staining <sup>1</sup> |                | P-value  |
|-------------------------------------------------------|--------------|-----------------------------------|----------------|----------|
|                                                       |              | ≤ 30%                             | >30%           |          |
|                                                       |              | (No. of cases)                    | (No. of cases) |          |
| Tumor size                                            | ≤ 8 cm       | 26                                | 25             | 0.0054** |
|                                                       | > 8 cm       | 4                                 | 21             |          |
| Cellular differentiation by Edmondson-Steiner grading | I-II & II    | 16                                | 8              | 0.0005** |
|                                                       | II-III       | 5                                 | 5              |          |
|                                                       | III & III-IV | 10                                | 32             |          |
| Survival time                                         | ≤500 days    | 9                                 | 27             | 0.0191*  |
|                                                       | >500 days    | 21                                | 19             |          |
| Portal venous emboli                                  | Positive     | 2                                 | 14             | 0.0195*  |
|                                                       | Negative     | 28                                | 32             |          |
| AFP (ng/mL)                                           | ≤300         | 21                                | 20             | 0.0339*  |
|                                                       | >300         | 9                                 | 26             |          |
| Distant metastasis                                    | Positive     | 2                                 | 3              | 1.000    |
|                                                       | Negative     | 28                                | 43             |          |
| HBV infection                                         | Positive     | 26                                | 41             | 0.7331   |
|                                                       | Negative     | 4                                 | 5              |          |
| Gender                                                | Male         | 28                                | 37             | 0.1837   |
|                                                       | Female       | 2                                 | 9              |          |

<sup>1</sup> Integrated optical density (IOD) SUM of nuclei MCM7/IOD SUM of total MCM7

\* $P < 0.05$ , \*\* $P < 0.01$  determined by Fisher's exact test.

## Supplementary references

1. **Zhang L, Sun H, Zhao F, Lu P, Ge C, Li H, Hou H, et al.** BMP4 administration induces differentiation of CD133+ hepatic cancer stem cells, blocking their contributions to hepatocellular carcinoma. *Cancer Res* 2012;72:4276-4285.
2. **Scott KL, Nogueira C, Heffernan TP, van Doorn R, Dhakal S, Hanna JA, Min C, et al.** Proinvasion metastasis drivers in early-stage melanoma are oncogenes. *Cancer Cell* 2011;20:92-103.
3. **Zhou JN, Zeng Q, Wang HY, Zhang B, Li ST, Nan X, Cao N, et al.** MicroRNA-125b attenuates epithelial-mesenchymal transitions and targets stem-like liver cancer cells through small mothers against decapentaplegic 2 and 4. *Hepatology* 2015;62:801-815.
4. **Yan XL, Jia YL, Chen L, Zeng Q, Zhou JN, Fu CJ, Chen HX, et al.** Hepatocellular carcinoma-associated mesenchymal stem cells promote hepatocarcinoma progression: role of the S100A4-miR155-SOCS1-MMP9 axis. *Hepatology* 2013;57:2274-2286.
5. **Jia YL, Shi L, Zhou JN, Fu CJ, Chen L, Yuan HF, Wang YF, et al.** Epimorphin promotes human hepatocellular carcinoma invasion and metastasis through activation of focal adhesion kinase/extracellular signal-regulated kinase/matrix metalloproteinase-9 axis. *Hepatology* 2011;54:1808-1818.
